# Supplementary material
Source: bioRxiv or medRxiv preprint supplement (https://www.biorxiv.org/highwire/filestream/92959/field_highwire_adjunct_files/6/302307-5.pdf)
Supplement: Supplementary file [file 302307-5.pdf]

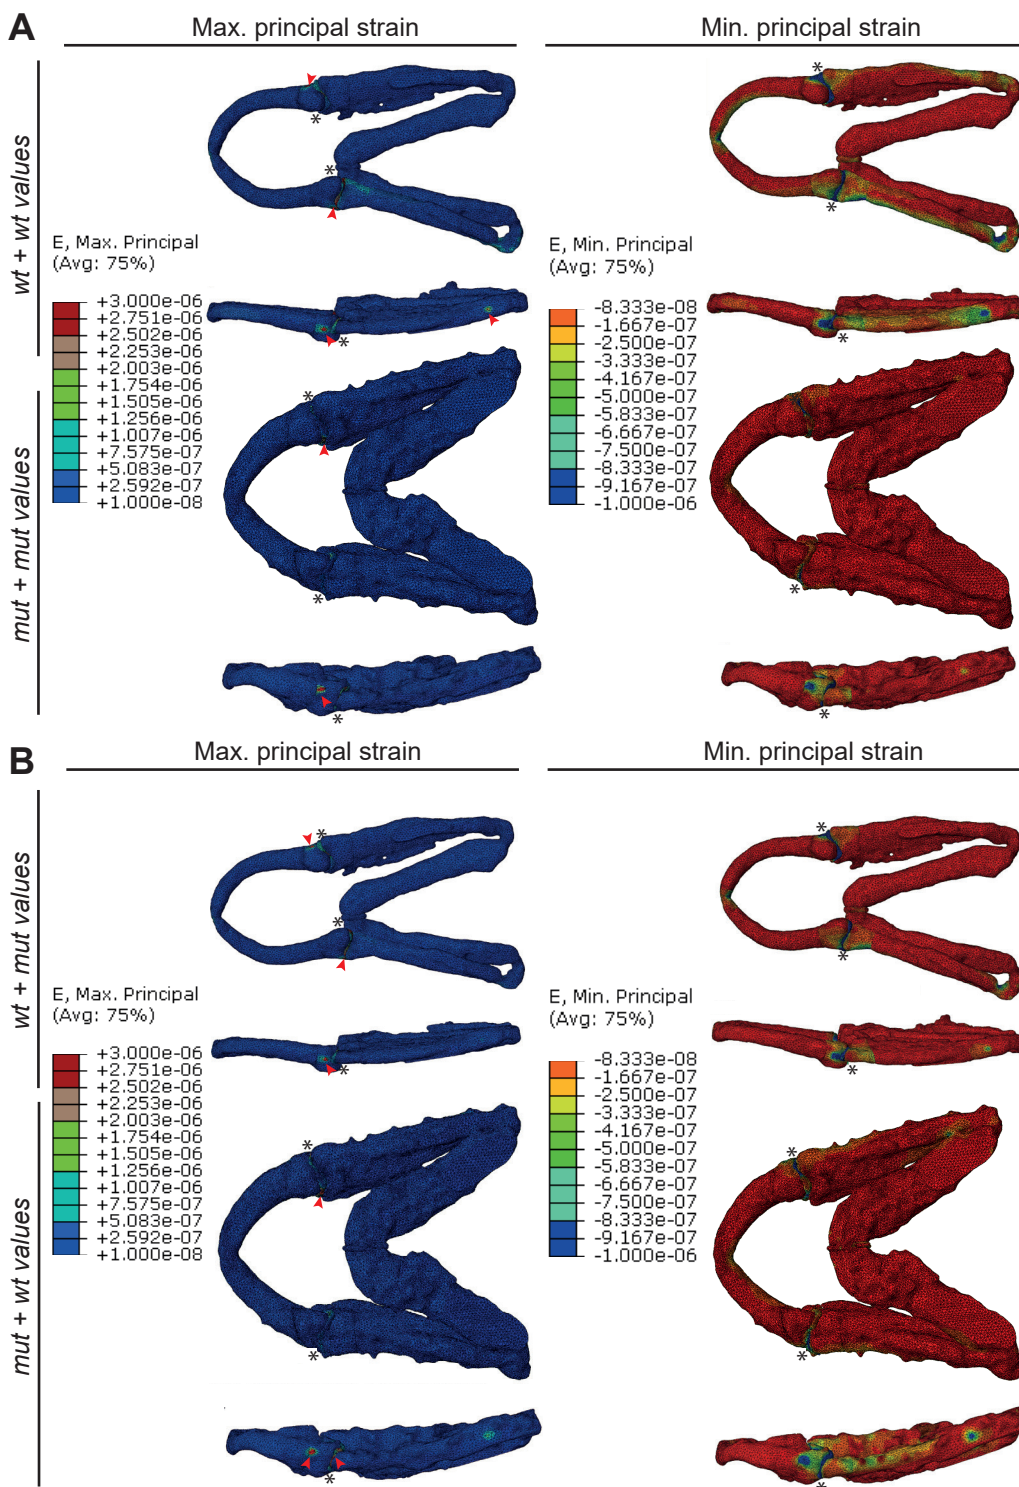

**Supplementary Figure 5: Shape changes in *col11a2* zebrafish mutants have a greater affect on jaw biomechanics than material property changes.** A,B) Finite Element (FE) models of maximum (E. Max) and minimum (E. Min) principal strain during mouth closing in 7dpf wt and *col11a2*<sup>-/-</sup> zebrafish. Red arrowheads = areas of high strain, black asterisk = jaw joint. A) wt jaw shape with wt material properties and *col11a2*<sup>-/-</sup> shape with *col11a2*<sup>-/-</sup> material properties. B) wt shape with *col11a2*<sup>-/-</sup> material properties and *col11a2*<sup>-/-</sup> shape with wt material properties. Ventral and lateral views shown for each.
